# Supplementary material for: Refining Liver Safety Risk Assessment: Application of Mechanistic Modeling and Serum Biomarkers to Cimaglermin Alfa (GGF2) Clinical Trials
Source: PubMed Central journal article supplement — Clin Pharmacol Ther. 2017 May 27;102(6):961–9. doi: 10.1002/cpt.711 (PMC5697568; doi:10.1002/cpt.711), 2017-05-27
Supplement: CPT-102-961-s006.pdf [file CPT-102-961-s006.pdf]

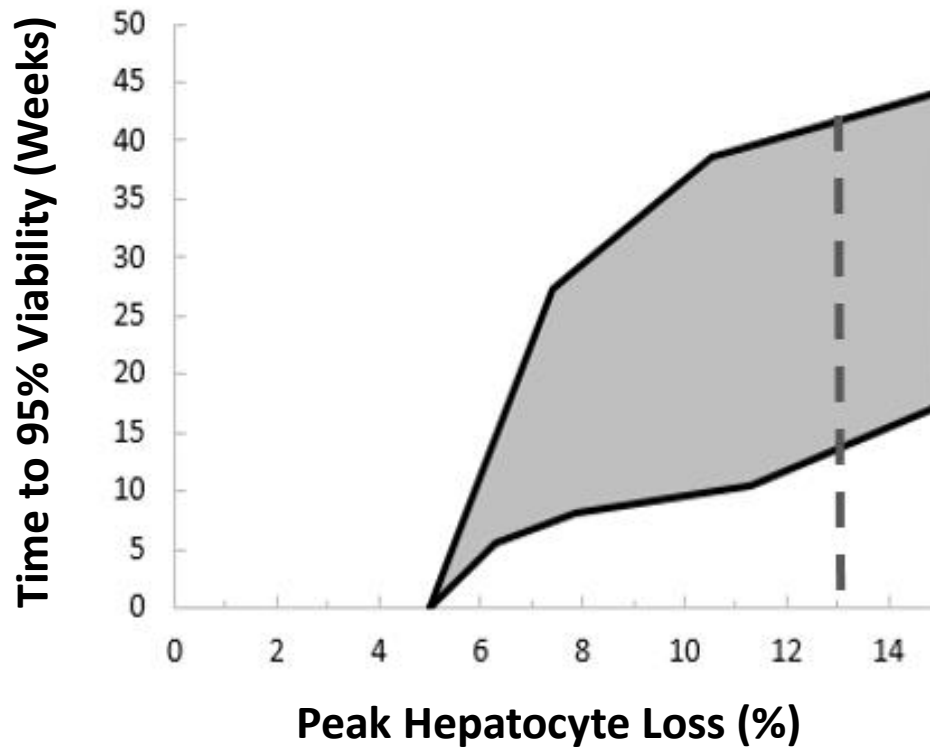

**Supplementary Figure S2** Simulated liver regeneration time following injury with 100% apoptosis as the mode of cell death for the alanine transaminase (ALT) simulated population (SimPops). The estimated recovery time (i.e. time to reach 95% viability) ranges from approximately 13 to 42 weeks for an injury of 13% hepatocyte loss (indicated by the dashed line). Predicted recovery times for equivalent hepatocellular losses are very similar for necrosis.
